# Supplementary material
Source: PubMed Central journal article supplement (PMC5943191)

## 1 **Supplementary Information**

2

## 3 **Supplementary Materials and Methods**

4 *Mutant CD33 CAR constructs:* Amino acid residues ED237-239 and EEE248-250 of the 4-1BB  
5 domain (GenBank: AAA53133), reported to bind TRAF family members <sup>1,2</sup> were changed to  
6 AAA. Residues Y72, Y83, Y111, Y123, Y142 and Y153 of the CD3 $\zeta$  domain (GenBank: NP932170),  
7 comprising the ITAMs that bind to ZAP70 <sup>3</sup> were changed to phenylalanines.

8

9 *Flow cytometry:* Immunophenotypic analysis was performed using anti-human CD4 (clone  
10 OKT4), CD3 (UCHT1), CD33 (WM53), CD62L (DREG56), CD95 (DX2), CD69 (FN50), 4-1BB (4B4),  
11 TIM-3 (F38-2E2), LAG-3 (3DS223H), TNF $\alpha$ , (MAb11), and Grzb, (GB11) from eBioscience; CD8  
12 (HIT8a), CD19 (HIB19), CD45 (HI30), CCR7 (G043H7), CD45RA (HI100), CD45RO (UCHL1), CD25  
13 (BC96), PD-1 (EH12.2H7), IL2 (MQ1-17H12), and IFN $\gamma$ , (4S.B3) from Biolegend; p-S6 Ribosomal  
14 Protein S235/236 (D57.2.2E), p-4E-BP1 Thr37/46 (236B4), p-AKT S473 (D9E), and p-ERK 1/2  
15 (197G2) from Cell Signaling Technologies. For intracellular cytokine staining, T cells were  
16 stimulated with MOLM-13-CD19 cells at a 1:1 ratio, and incubated for 24 and 48 hours.  
17 Brefeldin A (eBioscience) was added and cells were stained using a fixation and  
18 permeabilization buffer set (eBioscience) 4 hours later. For phosphoflow, unstimulated cells  
19 and cells treated with 50 ng/ml PMA and 1  $\mu$ g/ml ionomycin for 10 minutes were fixed with 1%  
20 paraformaldehyde and permeabilized with cold 90% methanol prior to staining.

21

22 *RNA-sequencing:* Paired-end sequencing was performed using the HighSeq platform with 100bp  
23 read length. Reads were aligned to the human GRCh37-lite using SJCRH's Strongarm pipeline. <sup>4</sup>  
24 <sup>5</sup> Counts per gene were obtained using htseq-count version 0.6.1 <sup>6</sup> with Gencode vM5 <sup>7</sup> level 1  
25 and 2 gene annotations. Counts were normalized with VOOM <sup>8</sup> and analyzed with LIMMA <sup>9</sup>  
26 within the R statistical environment. Significance was defined as having a false discovery rate  
27 (FDR) <0.05. VOOM normalized counts were analyzed with QIAGEN's Ingenuity Pathway  
28 Analysis (IPA, QIAGEN).

29  
30 *Study approval:* Animal experiments were performed in AAALAC-accredited, SPF facilities in the  
31 SJCRH Animal Resource Center following national, state and institutional guidelines. Protocols  
32 were approved by the SJCRH Animal Care and Use Committee. Human cells were acquired from  
33 anonymized platelet collections of consenting healthy donors and approved by the SJCRH  
34 Institutional Review Board.

35  
36 *Statistical analysis:* Significance was determined using Graphpad Prism 6. For Kaplan-Meier  
37 survival analyses, significance was determined with the log-rank (Mantel-Cox) test. For  
38 quantification of tumor, CAR and control T cell numbers in single transfer experiments,  
39 significance was determined by one way ANOVA with Tukey's multiple comparison post-test.  
40 For co-transfer experiments assessing CAR and control T cell numbers, significance was  
41 determined by ratio paired t-test. For assessment of T<sub>N</sub>, T<sub>CM</sub>, T<sub>EM</sub>, and T<sub>EFF</sub> populations,  
42 significance was determined by two-way ANOVA with Tukey's multiple comparison post-test. In

- 43 experiments where the ratio of control to CAR-T cells was compared to an input ratio of 1:1,
- 44 significance was determined using a single-sample t-test with a theoretical mean of 1.

45 **Supplementary Figure Legends**

46 **Supplementary Figure 1.** The MOLM-13-CD19 cell line was incubated with CD33 CAR, CD19 CAR  
47 or vector-transduced control T cells at the indicated ratios for 24 or 48 hours. Tumor cells were  
48 quantified by flow cytometry and normalized to cultures without added T cells.

49  
50 **Supplementary Figure 2.** (A) NSG mice were injected with MOLM-13-CD19 tumor cells and  
51 treated with CD33 CAR, CD19 CAR, or control T cells. Organs were harvested 18 days after  
52 transfer. Total numbers of CD3<sup>+</sup>CD8<sup>+</sup> CAR or control T cells are shown. (B) CD33 CAR-T cells (GFP)  
53 and control T cells (RFP) were co-transferred in equal numbers into NSG mice in the presence or  
54 absence of tumor. Liver and spleen were harvested 5 days after transfer. Absolute number of  
55 CD4<sup>+</sup> CAR and control T cells in the presence or absence of tumor at day 5 is shown. \* p<0.05, \*\*  
56 p<0.01, \*\*\* p<0.001, \*\*\*\* p<0.0001.

57  
58 **Supplementary Figure 3.** (A) Histograms showing differentiation marker expression on CD8<sup>+</sup>  
59 CD33 CAR (solid line) or control (dashed line) T cells 6 or 12 days after activation. (B) Summary  
60 data of differentiation marker expression on CD8<sup>+</sup> CD33 CAR or control T cells 6 and 12 days after  
61 activation. (C) Representative dot plots showing gating strategy for CD8<sup>+</sup> T<sub>SCM</sub> subset of CAR and  
62 control T cells. (D) Naïve CD8<sup>+</sup>CD45RA<sup>+</sup>CD45RO<sup>-</sup>CCR7<sup>+</sup>CD95<sup>-</sup> T cells were sorted from donor  
63 samples and transduced with CD33 CAR or control vector. Composition of T<sub>N</sub>, T<sub>CM</sub>, T<sub>EM</sub>, and T<sub>EFF</sub>  
64 subsets was determined 9 days after activation. (D) Representative dot plots and summary data  
65 for the composition of T<sub>N</sub>, T<sub>CM</sub>, T<sub>EM</sub>, and T<sub>EFF</sub> CD8<sup>+</sup> T cell subsets in CD19 CAR and control T cells 6  
66 and 12 days after activation. (E) Activation and exhaustion marker expression on CD8<sup>+</sup> CD33 CAR

67 and control T cells 12 days after activation (F) Percent of T<sub>SCM</sub> cells among CD8<sup>+</sup> CD19 CAR and  
68 control T cells 6 and 12 days after activation. (G) Percent of T<sub>SCM</sub> cells 6 and 12 days after *ex vivo*  
69 activation. \* p<0.05, \*\* p<0.01, \*\*\* p<0.001, \*\*\*\* p<0.0001

70

71 **Supplementary Figure 4.** (A-B) CD33 CAR and control T cells were mixed 1:1 and transferred with  
72 or without MOLM-13-CD19 cells into NSG mice. (A) Differentiation marker expression levels on  
73 CD4<sup>+</sup> CAR-T cells in the liver and spleen 5 days after transfer. (B) Composition and (C) total  
74 numbers of CD4<sup>+</sup> T<sub>N</sub>, T<sub>CM</sub>, T<sub>EM</sub> and T<sub>EFF</sub> subsets in the liver and spleen 5 days after transfer. \*  
75 p<0.05, \*\* p<0.01, \*\*\* p<0.001, \*\*\*\* p<0.0001

76

77 **Supplementary Figure 5.** (A-B) Ingenuity Pathway Analysis (IPA) of genes differentially expressed  
78 (FDR<0.2) between CD8<sup>+</sup> CD33 CAR and control T cells generated from three unique healthy  
79 donors, evaluated 12 days after activation. (A) -log (p-value) of selected canonical pathways  
80 identified by IPA analysis as upregulated in CD8<sup>+</sup> CD33 CAR-T cells relative to control T cells. (B)  
81 Heat maps show genes uniquely dysregulated in CD8<sup>+</sup> CD33 CAR-T cells, segregated by pathway.  
82 (C) Representative histograms and summary data of phosphoflow staining of p-AKT and pERK in  
83 control and CD33 CAR-T cells 12 days after stimulation. CAR-T cells were stimulated with  
84 PMA/ionomycin for 10 minutes as a positive control. \*\*\* p<0.001, \*\*\*\* p<0.0001.

85

86 **Supplementary Figure 6.** Representative dot plots and summary data of CCR7 expression and  
87 proliferation as monitored by CellTrace Violet in CD8<sup>+</sup> CAR-T cells with or without inhibitor

88 treatment. Bar graph indicates percentage of proliferating CD8<sup>+</sup> cells that are CCR7<sup>+</sup>. \* p<0.05,  
89 \*\*\*\* p<0.0001.

90

91 **Supplementary Figure 7.** 5 days after activation, CD33 CAR-T cells were treated with PI3K  
92 inhibitor LY294002 (LY) as indicated for 4 days, followed by flow cytometric analysis. (A)  
93 Composition of CD8<sup>+</sup> T<sub>N</sub>, T<sub>CM</sub>, T<sub>EM</sub> and T<sub>EFF</sub> subsets. (B) Numbers of CD8<sup>+</sup> inhibitor treated and  
94 untreated CD33 CAR-T cells and control T cells, normalized to the number of untreated CAR-T  
95 cells. \*\* p<0.01.

96

97 **Supplementary Figure 8.** (A) MOLM-13-CD19 cells were incubated with CD33 CAR-T cells with  
98 or without LY294002 (LY) treatment, or control T cells at indicated ratios. Tumor cells were  
99 quantified and normalized to cultures without added T cells. (B) CD33 CAR-T cells with or without  
100 LY treatment, or control T cells were incubated 1:1 with MOLM-13-CD19 tumor cells for 48h prior  
101 to intracellular staining. (C) Mice were injected with MOLM-13-CD19 tumor cells and untreated  
102 or LY-treated CD33 CAR-T cells. Organs were harvested 14 days after transfer. Total cell numbers  
103 of CD8<sup>+</sup> T<sub>N</sub>, T<sub>CM</sub>, T<sub>EM</sub> and T<sub>EFF</sub> subsets are shown. \* p<0.05, \*\* p<0.01, \*\*\* p<0.001, \*\*\*\* p<0.0001

104

105

106 **Supplementary References**

- 107 1. Jang IK, Lee ZH, Kim YJ, Kim SH, Kwon BS. Human 4-1BB (CD137) signals are mediated by  
108 TRAF2 and activate nuclear factor-kappa B. *Biochemical and biophysical research*  
109 *communications* 1998 Jan 26; **242**(3): 613-620.
- 110
- 111 2. Arch RH, Thompson CB. 4-1BB and Ox40 are members of a tumor necrosis factor (TNF)-  
112 nerve growth factor receptor subfamily that bind TNF receptor-associated factors and  
113 activate nuclear factor kappaB. *Molecular and cellular biology* 1998 Jan; **18**(1): 558-565.
- 114
- 115 3. Zhao Y, Wang QJ, Yang S, Kochenderfer JN, Zheng Z, Zhong X, *et al.* A herceptin-based  
116 chimeric antigen receptor with modified signaling domains leads to enhanced survival of  
117 transduced T lymphocytes and antitumor activity. *Journal of immunology* 2009 Nov 1;  
118 **183**(9): 5563-5574.
- 119
- 120 4. Pinto EM, Chen X, Easton J, Finkelstein D, Liu Z, Pounds S, *et al.* Genomic landscape of  
121 paediatric adrenocortical tumours. *Nat Commun* 2015 Mar 06; **6**: 6302.
- 122
- 123 5. de Sa PH, Veras AA, Carneiro AR, Pinheiro KC, Pinto AC, Soares SC, *et al.* The impact of  
124 quality filter for RNA-Seq. *Gene* 2015 Jun 01; **563**(2): 165-171.
- 125
- 126 6. Anders S, Pyl PT, Huber W. HTSeq--a Python framework to work with high-throughput  
127 sequencing data. *Bioinformatics* 2015 Jan 15; **31**(2): 166-169.

128

129 7. Harrow J, Frankish A, Gonzalez JM, Tapanari E, Diekhans M, Kokocinski F, *et al.*

130 GENCODE: the reference human genome annotation for The ENCODE Project. *Genome*

131 *research* 2012 Sep; **22**(9): 1760-1774.

132

133 8. Law CW, Chen Y, Shi W, Smyth GK. voom: Precision weights unlock linear model analysis

134 tools for RNA-seq read counts. *Genome Biol* 2014 Feb 03; **15**(2): R29.

135

136 9. Ritchie ME, Phipson B, Wu D, Hu Y, Law CW, Shi W, *et al.* limma powers differential

137 expression analyses for RNA-sequencing and microarray studies. *Nucleic acids research*

138 2015 Apr 20; **43**(7): e47.



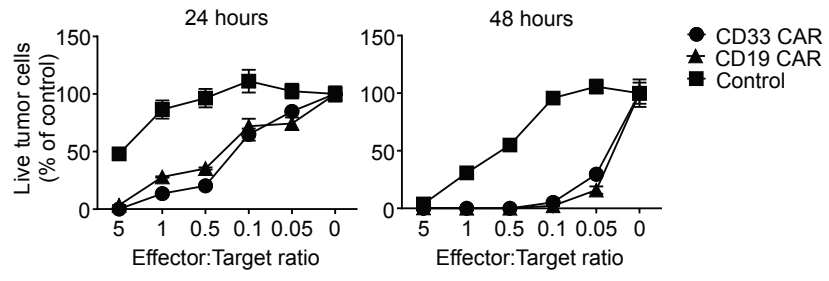

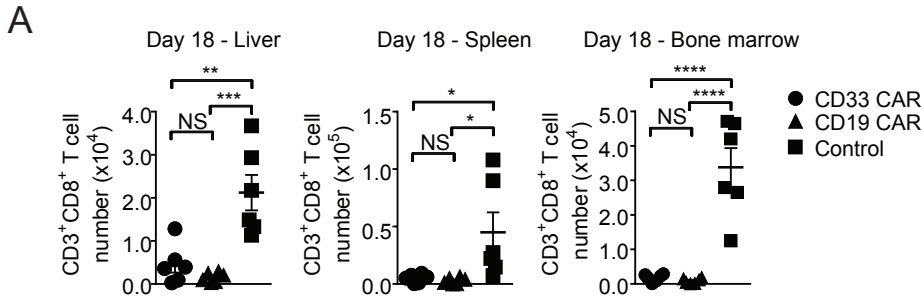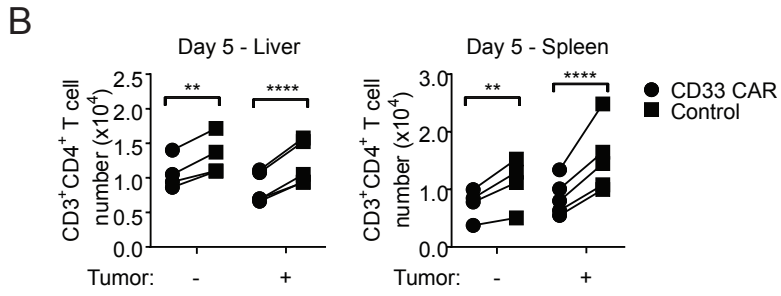

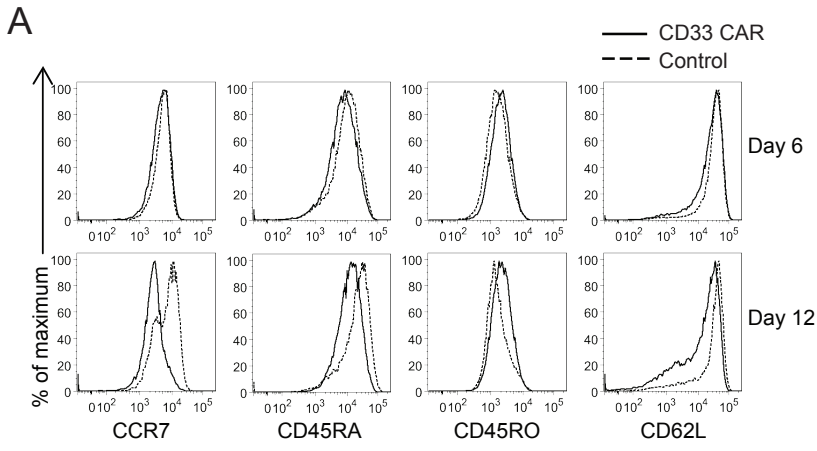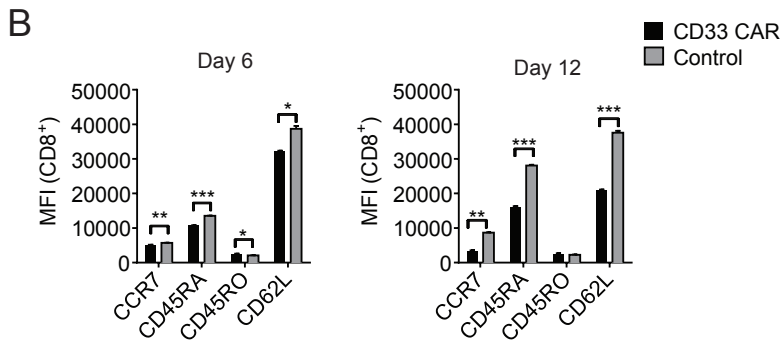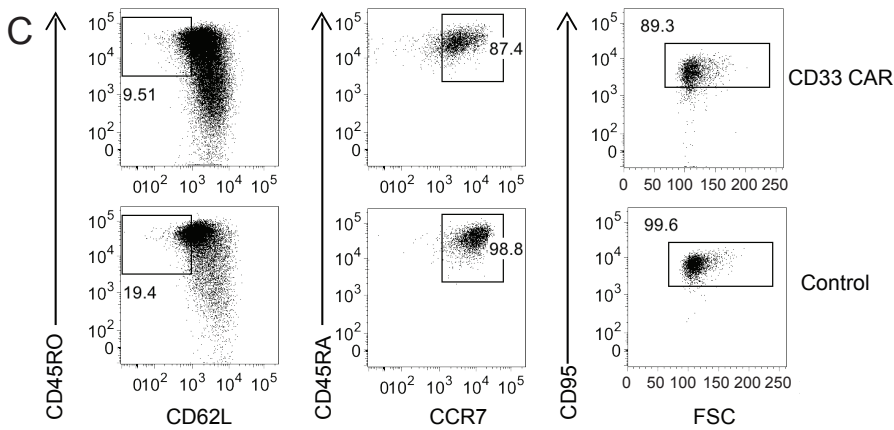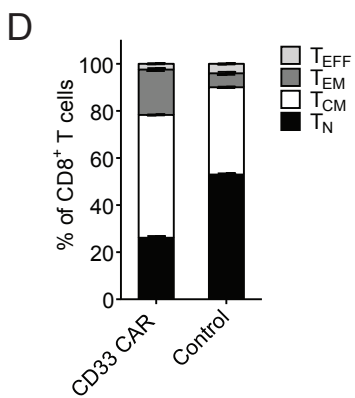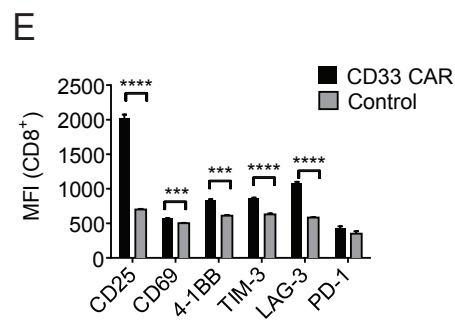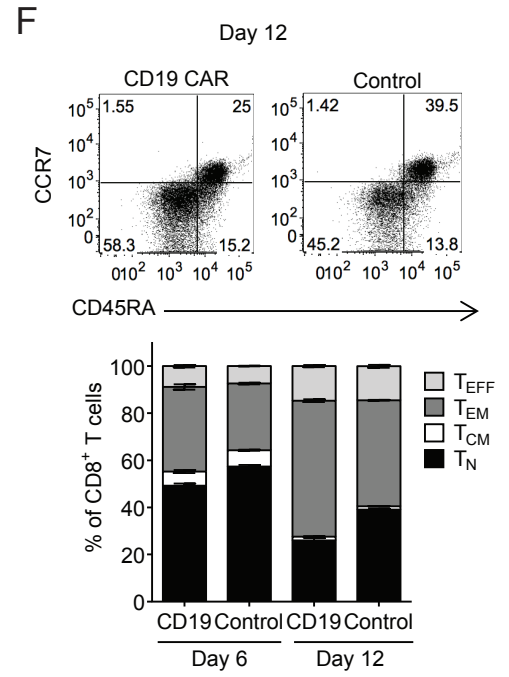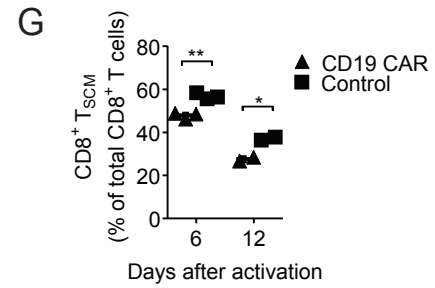

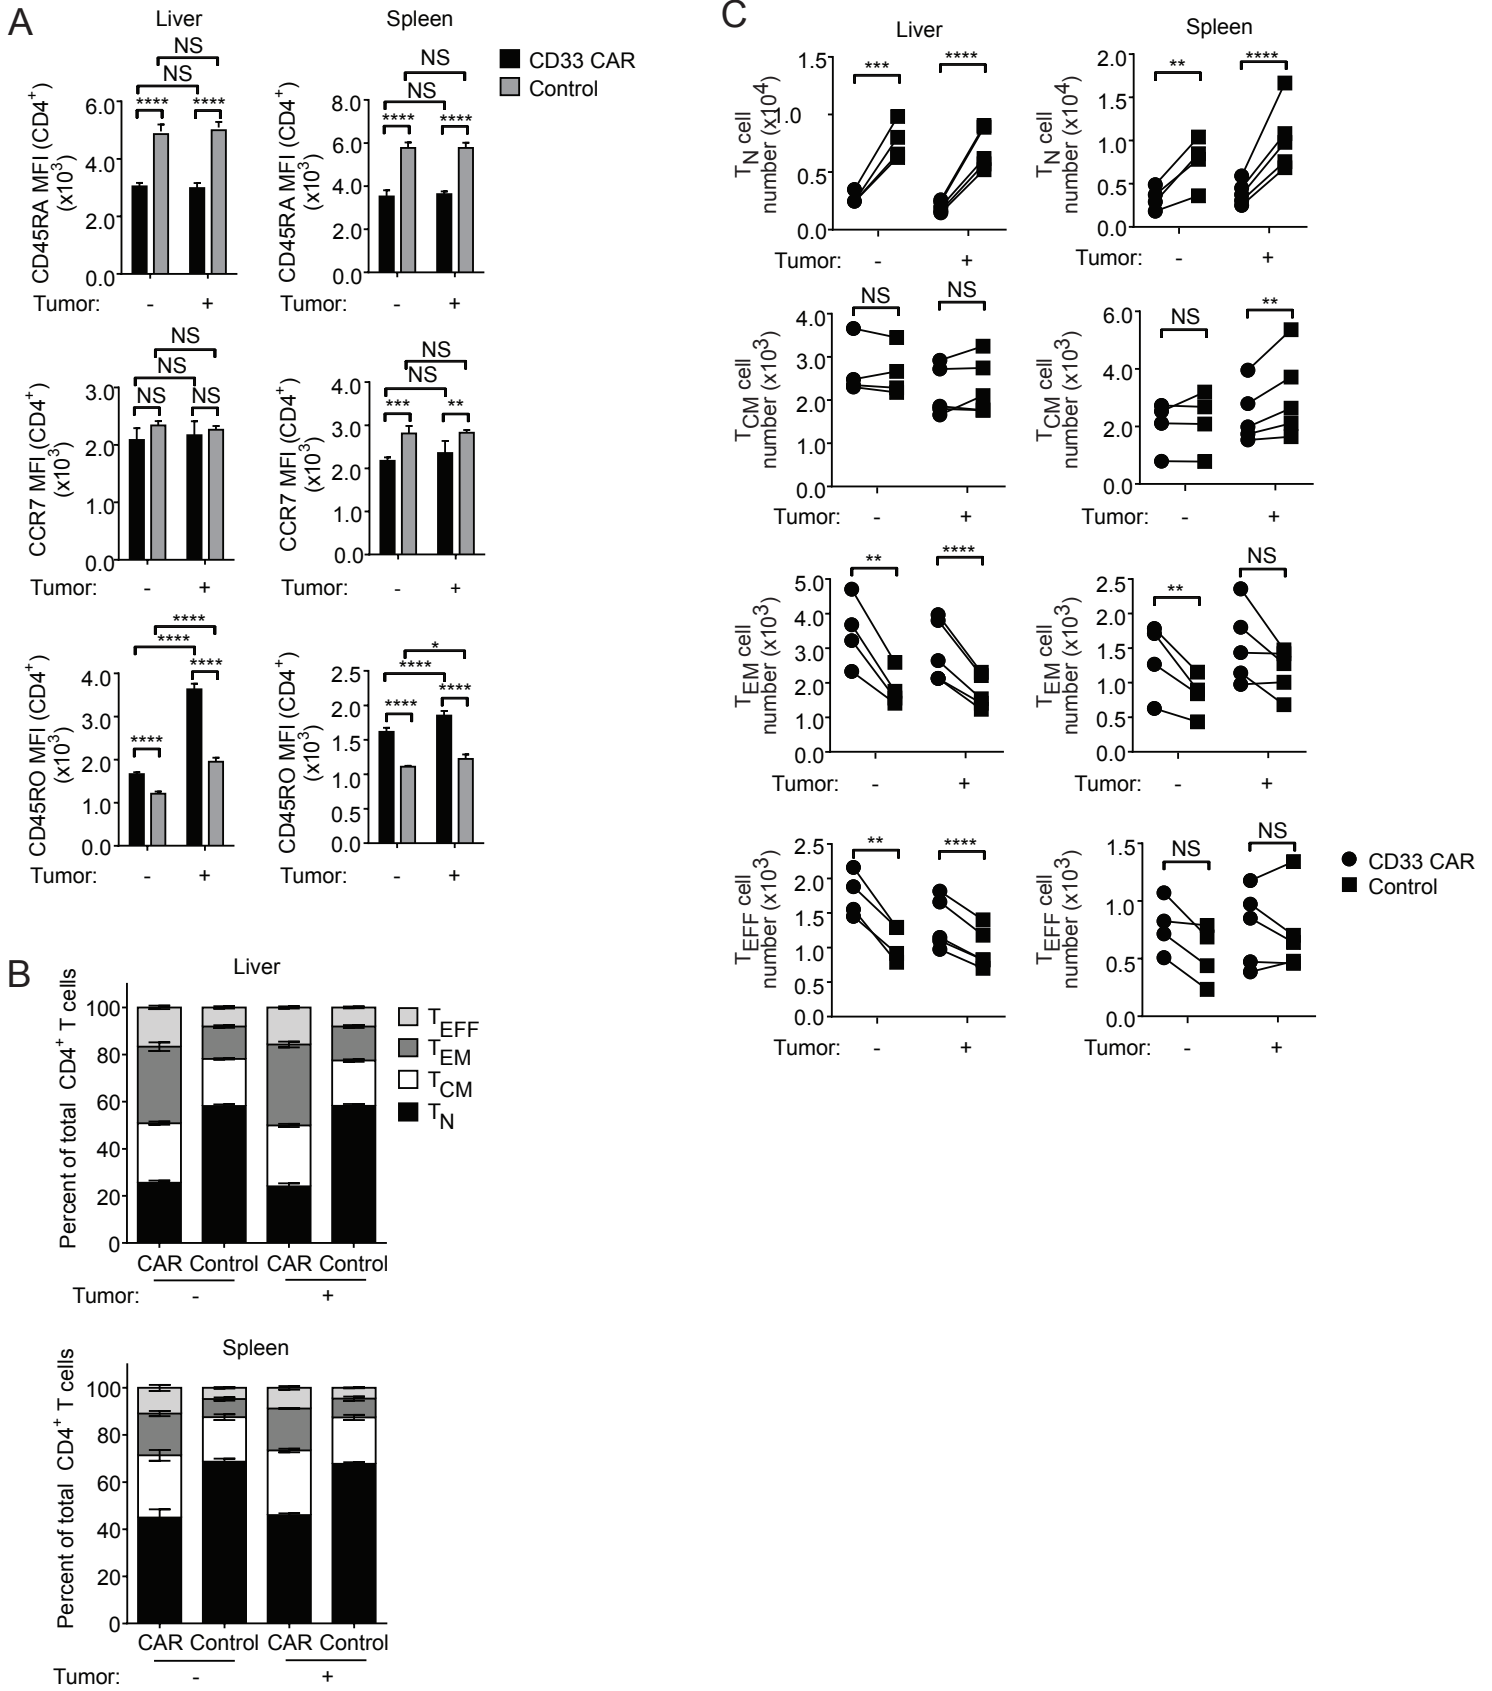

A

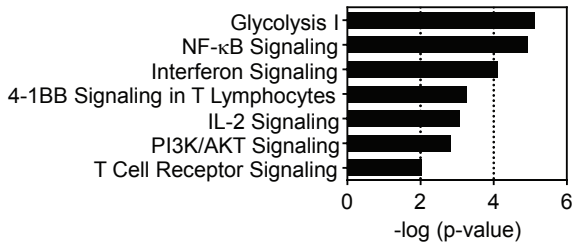

B

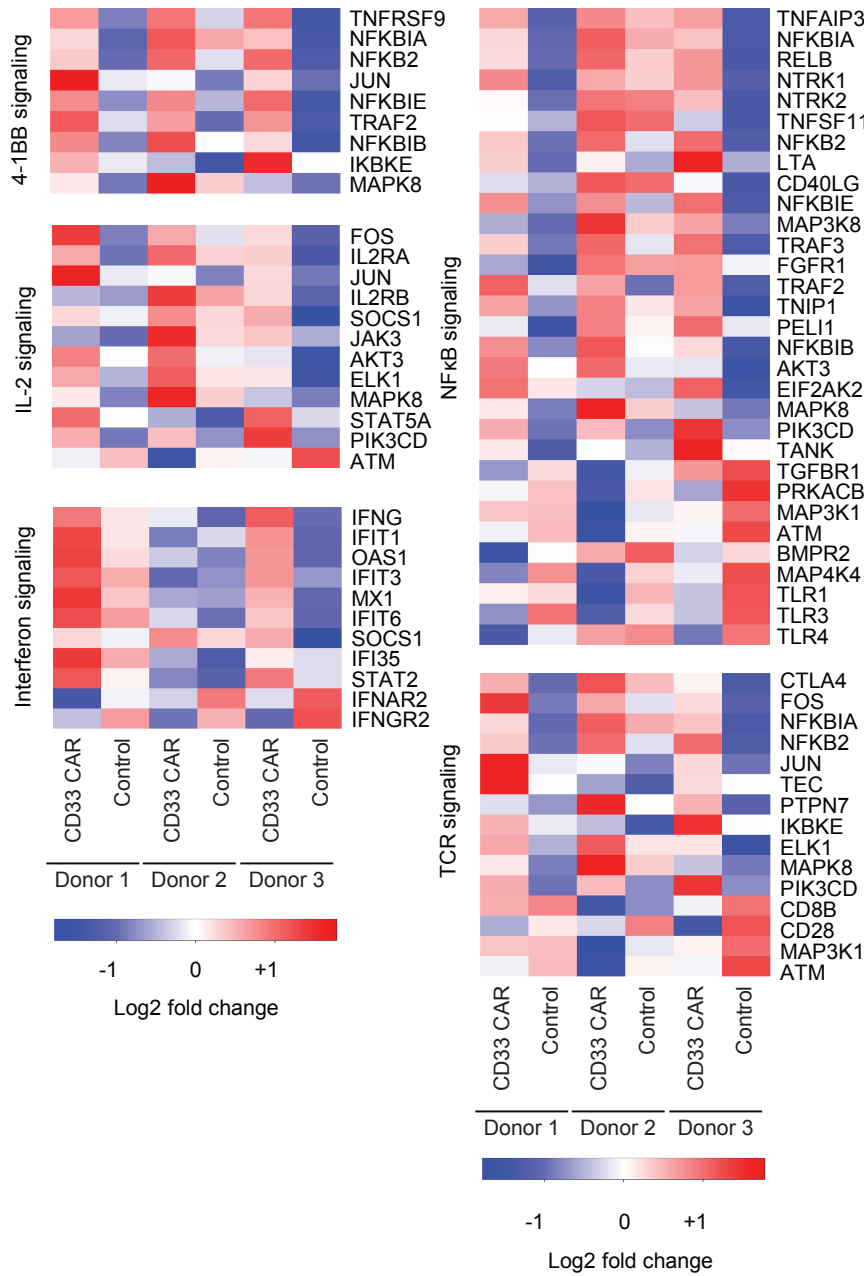

C

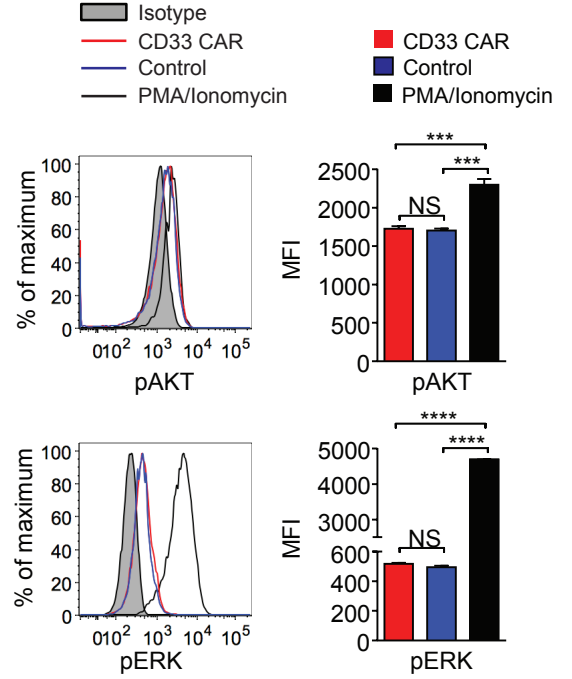

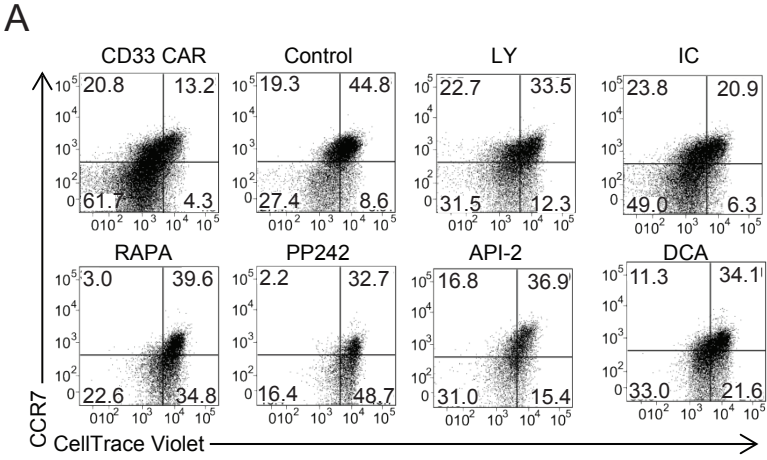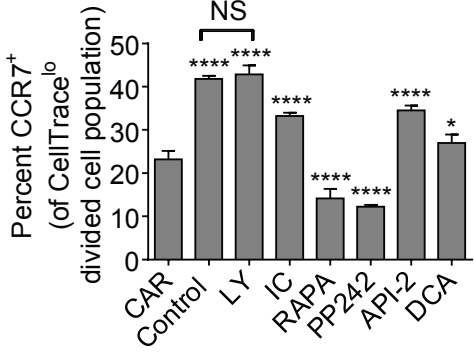

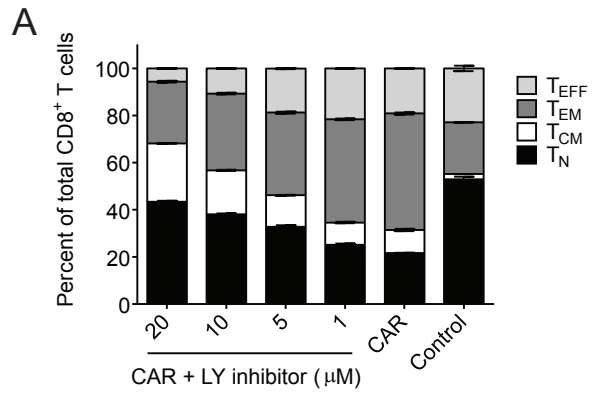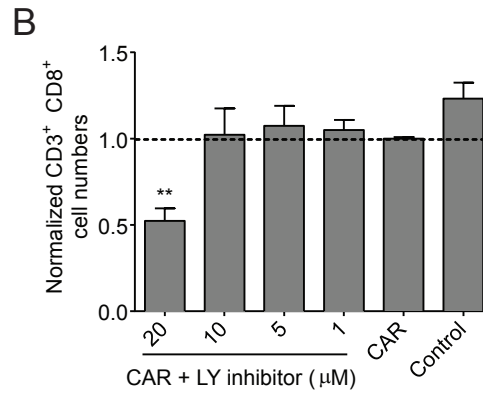

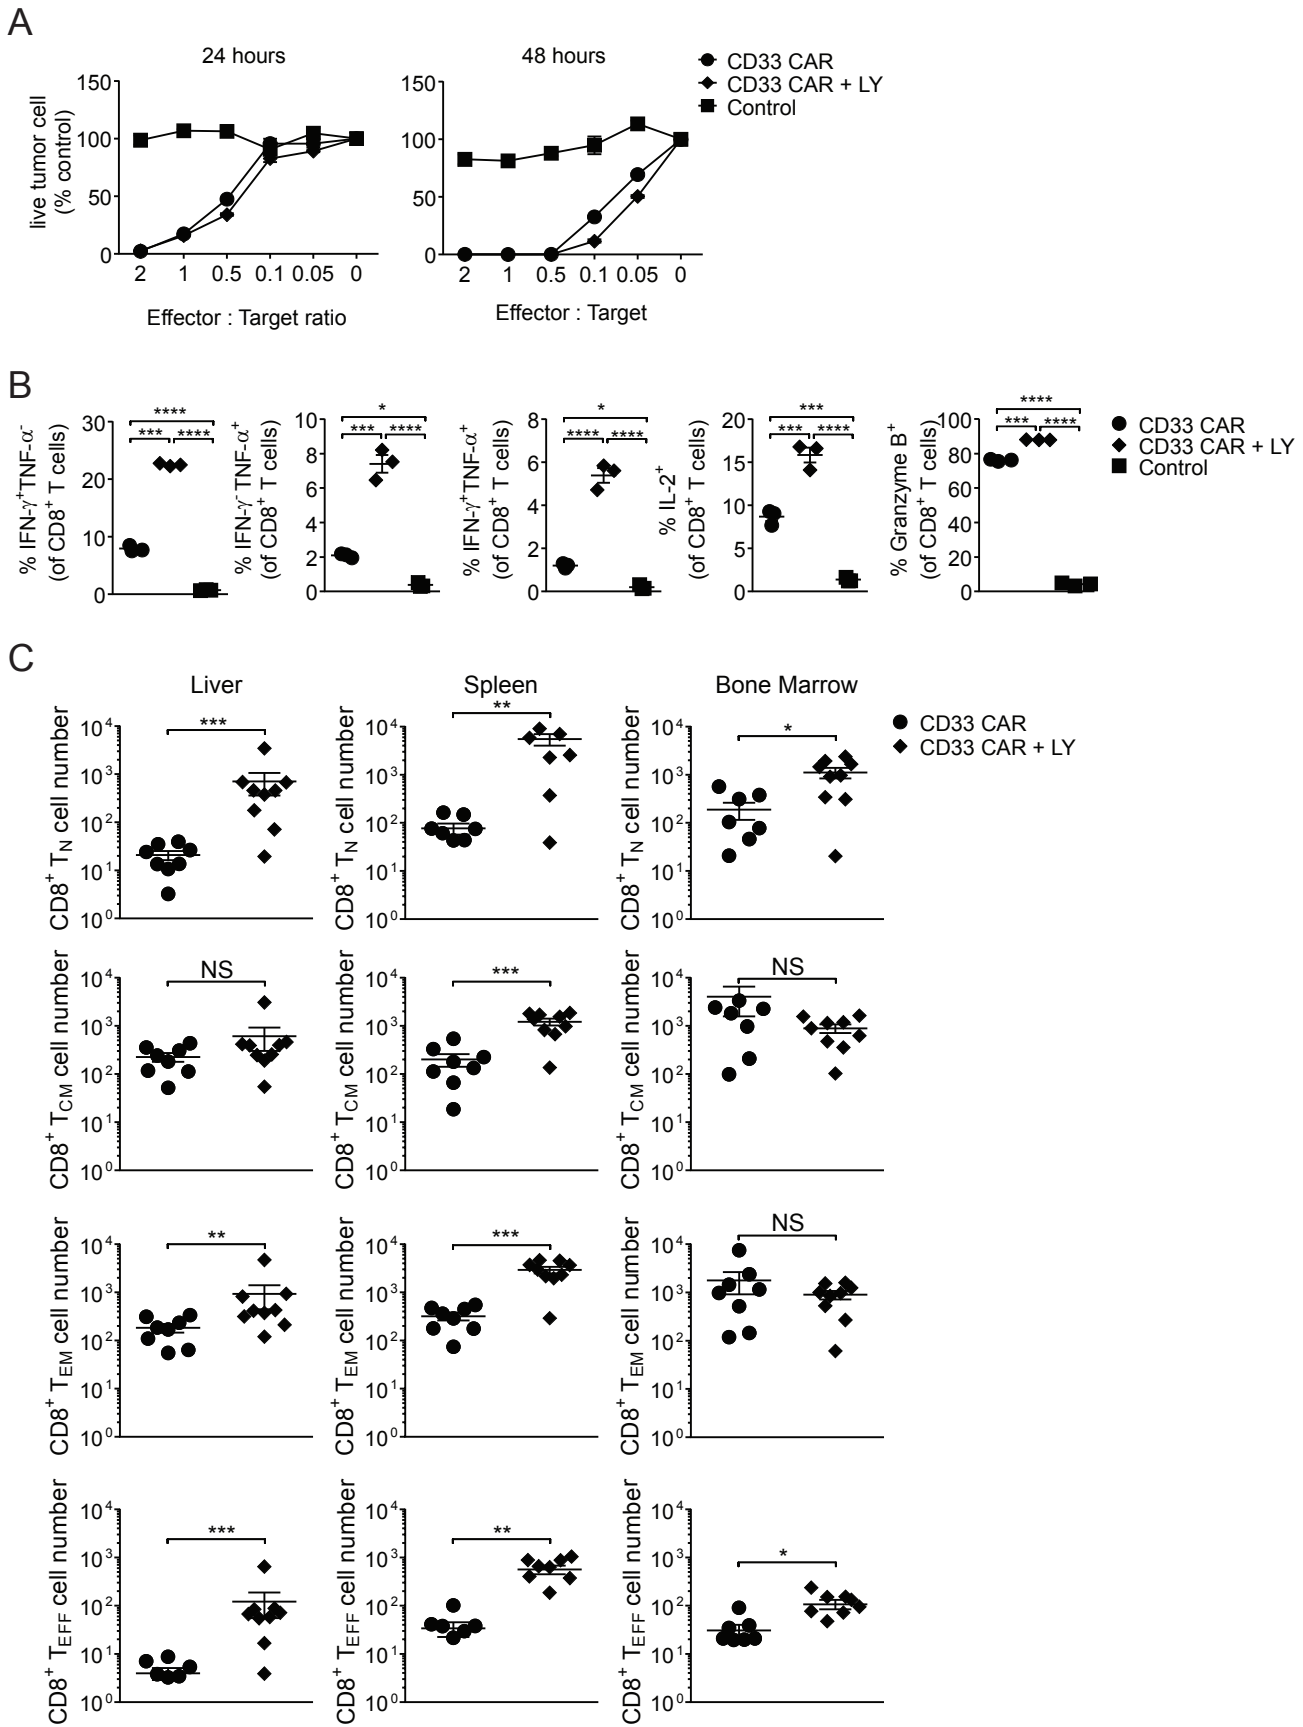

Supplement: NIHMS929317-supplement-Supplementary_materials.pdf [file NIHMS929317-supplement-Supplementary_materials.pdf]
